# Supplementary material for: Chemical etching of pH-sensitive aggregation-induced emission-active gold nanoclusters for ultra-sensitive detection of cysteine
Source: Royal Society of Chemistry journal article supplement (doi:10.1039/c8nr08526a), 2018-11-27
Supplement: c8nr08526a1.pdf [file c8nr08526a1.pdf]

# Supporting Information

## **Chemical etching of pH-sensitive aggregation-induced emission-active gold nanoclusters for ultra-sensitive detection of cysteine**

Jianxing Wang,<sup>a</sup> Xiangfang Lin,<sup>a</sup> Lei Su,<sup>a,b,\*</sup> Junfa Yin,<sup>c</sup> Tong Shu<sup>a</sup> and Xueji Zhang<sup>a,\*</sup>

<sup>a</sup> Beijing Advanced Innovation Center of Materials Genome Engineering, Research Center for Bioengineering and Sensing Technology, School of Chemistry and Biological Engineering, University of Science and Technology Beijing, Beijing 100083, P. R. China.

<sup>b</sup> Beijing Advanced Innovation Center for Food Nutrition and Human Health, Beijing Technology and Business University (BTBU), Beijing 100048, P. R. China.

<sup>c</sup> State Key Laboratory of Environmental Chemistry and Ecotoxicology, Research Center for Eco-Environmental Sciences, Chinese Academy of Sciences, Beijing 100085, P.R. China.

\* Corresponding authors: [sulei@ustb.edu.cn](mailto:sulei@ustb.edu.cn); [zhangxueji@ustb.edu.cn](mailto:zhangxueji@ustb.edu.cn).

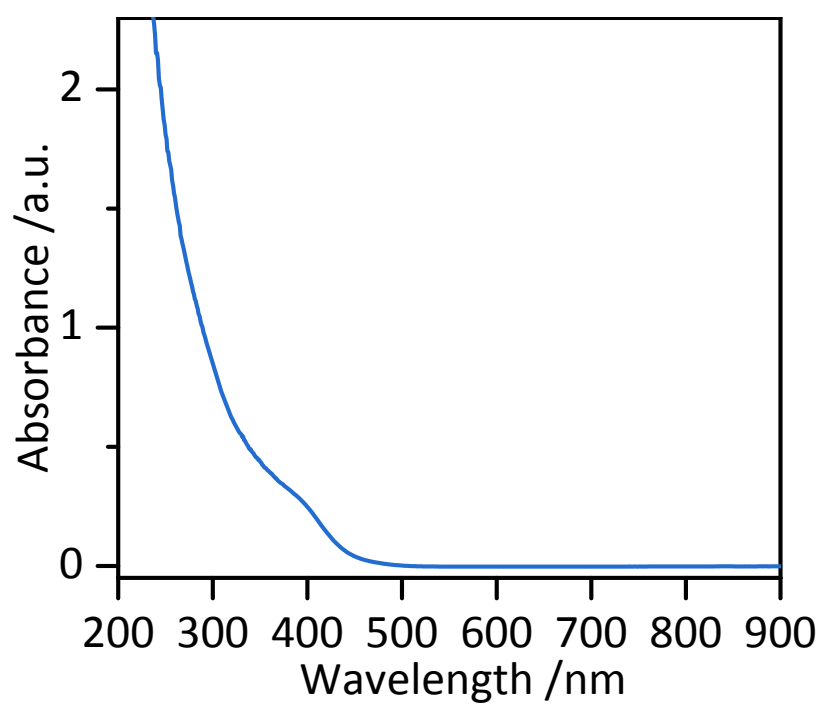

**Figure S1.** UV-vis absorption of the as-prepared AIE-active Au NCs.

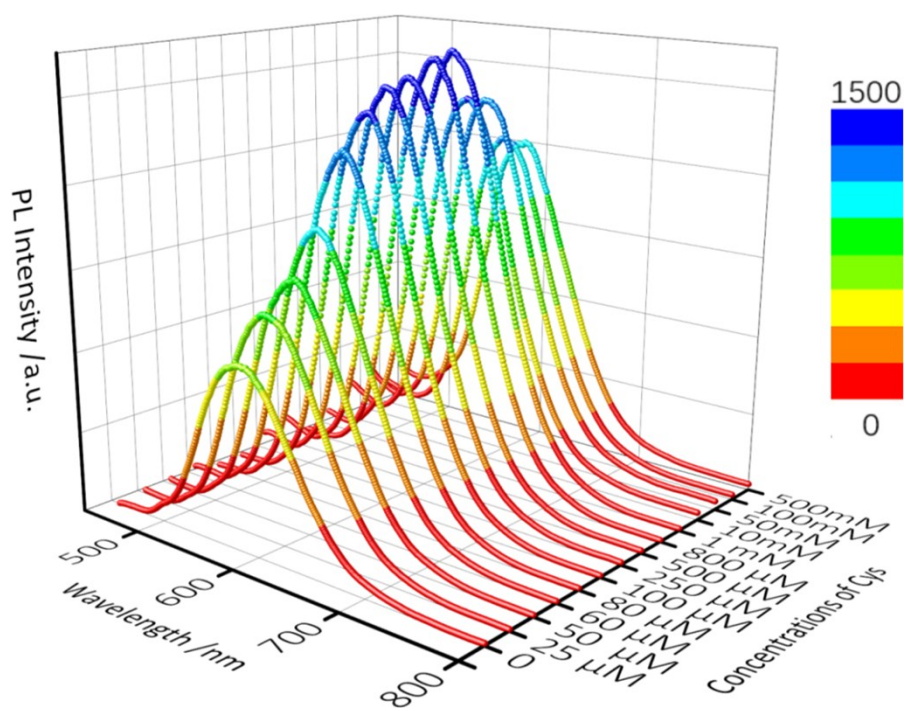

**Figure S2.** PL spectra of the Au NC solution containing various concentrations of cysteine (25  $\mu$ M - 500 mM) at pH 2.0 recorded after reaction for 2 hours.

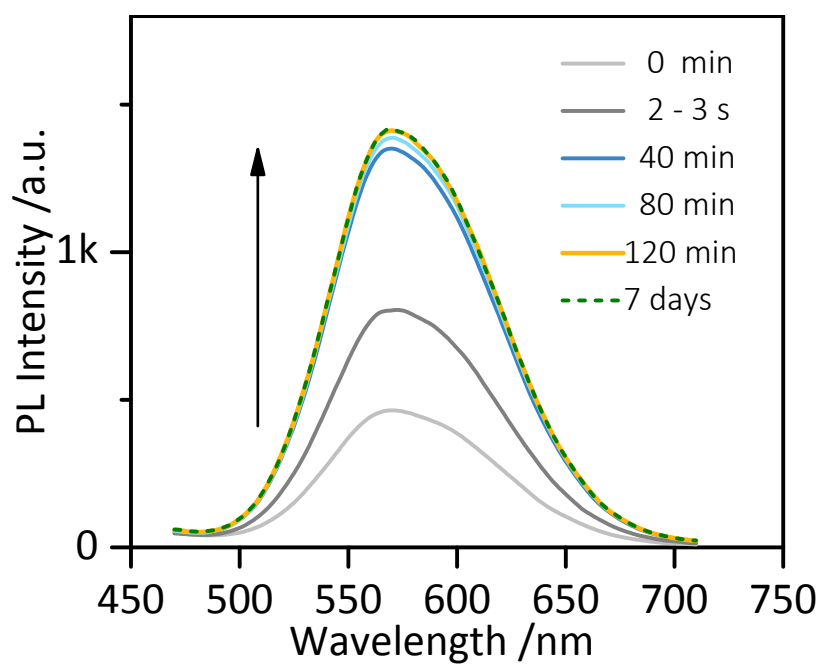

**Figure S3.** Time-dependent PL spectra of the as-prepared Au NC solution incubating with 1 mM cysteine at pH 2.0.

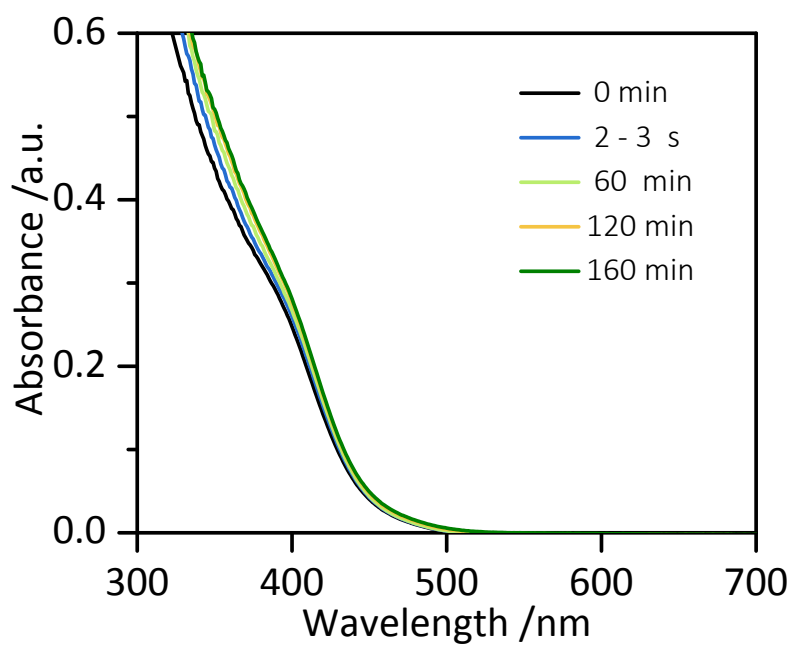

**Figure S4.** Time-dependent UV-vis absorption spectra of the as-prepared Au NC solution incubating with 1mM cysteine at pH 2.0. Note: the curve of 120 min coincides totally with that of 160 min.

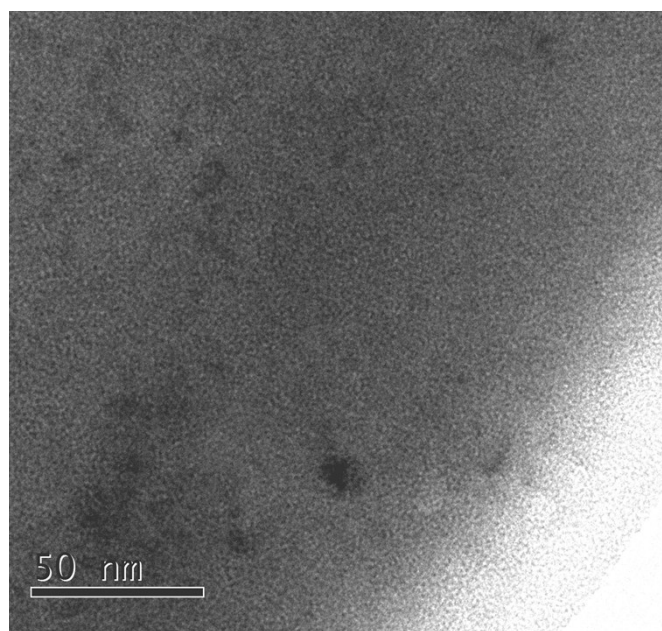

**Figure S5.** TEM image of the as-prepared Au NC solution at pH 2.0.

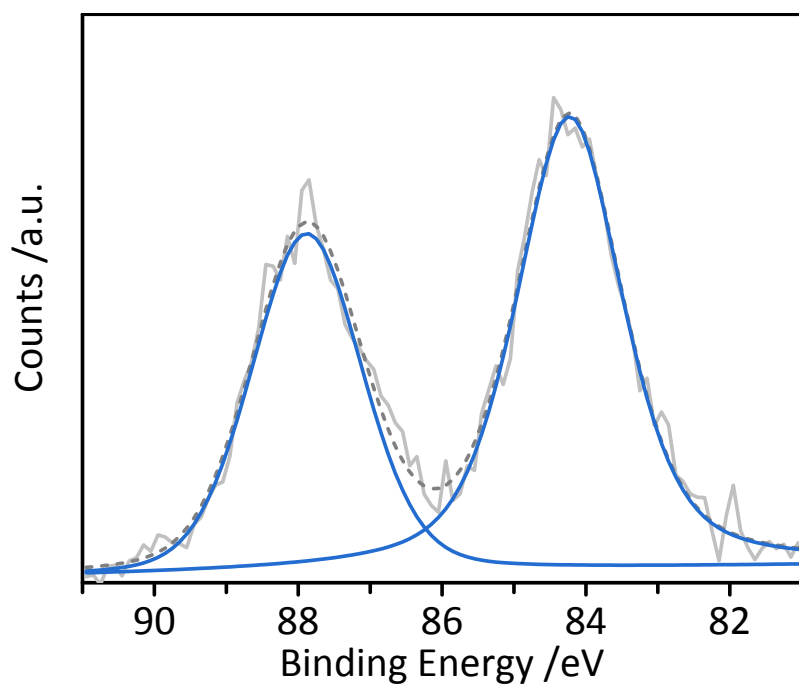

**Figure S6.** The Au 4f XPS spectra of the AIE-active Au NCs after reaction with 1 mM cysteine at pH 11.0.

**Table 1.** Comparison of the proposed sensor with previously reported metal NCs-based cysteine sensors.

| Sensors                                    | Linear range | LOD            | Refs.     |
|--------------------------------------------|--------------|----------------|-----------|
| BSA-Au NCs <sup>(a)</sup>                  | 2-800 nM     | 1.2 nM         | 1         |
| BSA-Au NCs+Hg <sup>2+</sup> <sup>(a)</sup> | 0-250 nM     | 8.3 nM         | 2         |
| BSA-Au NCs+Ag <sup>+</sup> <sup>(a)</sup>  | 0-2.71 μM    | 16.54 nM       | 3         |
| BSA-Au NCs+Au NPs <sup>(a)</sup>           | 0.5 mM-50 μM | 3.6 μM         | 4         |
| NBD/BSA-Au NCs <sup>(a)</sup>              | 8.33-100 μM  | 1.45 μM        | 5         |
| BSA-Au NCs <sup>(b)</sup>                  | 0.2-60 μM    | 80 nM          | 6         |
| GO/Au NCs <sup>(c)</sup>                   | 0.05-20 μM   | 0.02 μM        | 7         |
| PMAA-Ag NCs <sup>(a)</sup>                 | 25 nM-6.0 mM | 20 nM          | 8         |
| AC12T-Ag NCs <sup>(a)</sup>                | 8-100 nM     | 4 nM           | 9         |
| dC <sub>12</sub> -Ag NCs <sup>(a)</sup>    | 25-200 nM    | 0.15 nM        | 10        |
| C-rich ssDNA-Ag NCs <sup>(a)</sup>         | 1 nM-7.5 μM  | 0.5 nM         | 11        |
| DNA-Ag NCs <sup>(a)</sup>                  | 0-5 μM       | 0.134 μM       | 12        |
| DNA-Ag NCs+Hg <sup>2+</sup> <sup>(a)</sup> | 0.02-0.6 μM  | 1.59 nM        | 13        |
| L-GSH reduced-Ag NCs <sup>(a)</sup>        | 0-500 nM     | 3 nM           | 14        |
| L-GSH-Ag NCs <sup>(a)</sup>                | 0.025-50 μM  | 3.4 nM         | 15        |
| PI-Ag NCs <sup>(a)</sup>                   | 0.1-5 μM     | <sup>(f)</sup> | 16        |
| PEI-Ag NCs <sup>(a)</sup>                  | 0.1-10 μM    | 42 nM          | 17        |
| LSPR-Ag NCs <sup>(a)</sup>                 | 0.5-100 nM   | 0.32 nM        | 18        |
| Dual emission Ag NCs <sup>(a)</sup>        | 0.5-220 μM   | 10 nM          | 19        |
| PMAA-Ag NCs <sup>(d)</sup>                 | 5 nM-1 μM    | 2.5 nM         | 20        |
| DNA-Ag NCs <sup>(e)</sup>                  | 0.5-50 μM    | 5.38 μM        | 21        |
| BSA-Cu NCs <sup>(a)</sup>                  | 0.2-10 mM    | 57 μM          | 22        |
| PEI-Cu NCs <sup>(a)</sup>                  | 1-25 μM      | 0.34 μM        | 23        |
| DNA-Ag/Pt bimetallic NCs <sup>(a)</sup>    | 5-500 nM     | 2 nM           | 24        |
| BSA-Pt/Au bimetallic NCs <sup>(a)</sup>    | 0.1-50 μM    | 0.04 μM        | 25        |
| AIE-type GSH-Au NCs <sup>(a)</sup>         | 10 pM-2 mM   | 6.3 pM         | This work |

<sup>(a)</sup> Fluorescent Sensors; <sup>(b)</sup> Colorimetric Sensors; <sup>(c)</sup> Electrochemical Sensors; <sup>(d)</sup> Chemiluminescent Sensors; <sup>(e)</sup> Electrochemiluminescence (ECL) Methods; <sup>(f)</sup> not shown.



| Human serum samples | Added cysteine | Measured | Recovery (%) | RSD (n=3, %) |
|---------------------|----------------|----------|--------------|--------------|
| 1                   | 100 nM         | 95 nM    | 95 %         | 0.42         |
|                     | 1 mM           | 1.07 mM  | 107 %        | 2.30         |
| 2                   | 100 nM         | 103 nM   | 103 %        | 1.04         |
|                     | 1 mM           | 0.97 mM  | 97 %         | 1.58         |
| 3                   | 100 nM         | 109 nM   | 109 %        | 0.46         |
|                     | 1 mM           | 0.98 mM  | 98 %         | 0.26         |

**Table S1.** Recovery of cysteine from EDTA-pretreated human serum samples spiked with 100 nM and 1 mM cysteine, respectively.

## References

- (1) M. L. Cui; J. M. Liu; X. X. Wang; L. P. Lin; L. Jiao; L. H. Zhang; Z. Y. Zheng; S. Q. Lin. *Analyst* **2012**, *137*, 5346-5351.
- (2) K. S. Park; M. I. Kim; M. A. Woo; H. G. Park. *Biosens. Bioelectron.* **2013**, *45*, 65-69.
- (3) Y. Li; Y. Deng; X. D. Zhou; J. M. Hu. *Talanta* **2018**, *179*, 742-752.
- (4) X. Z. Xu; J. Qiao; N. Li; L. Qi; S. F. Zhang. *Anal. Chim. Acta* **2015**, *879*, 97-103.
- (5) H. Yu; Y. Liu; J. M. Wang; Q. Liang; H. Liu; J. Xu; S. J. Shao. *New J. Chem.* **2017**, *41*, 4416-4423.
- (6) Y. W. Wang; S. Tang; H. H. Yang; H. Song. *Talanta* **2016**, *146*, 71-74.
- (7) S. G. Ge; M. Yan; J. J. Lu; M. Zhang; F. Yu; J. H. Yu; X. R. Song; S. L. Yu. *Biosens. Bioelectron.* **2012**, *31*, 49-54.
- (8) L. Shang; S. J. Dong. *Biosens. Bioelectron.* **2009**, *24*, 1569-1573.
- (9) B. Y. Han; E. Wang. *Biosens. Bioelectron.* **2011**, *26*, 2585-2589.
- (10) Z. Z. Huang; F. Pu; Y. H. Lin; J. S. Ren; X. G. Qu. *Chem. Commun.* **2011**, *47*, 3487-3489.
- (11) G. L. Liu; D. Q. Feng; X. Y. Mu; W. J. Zheng; T. F. Chen; L. Qi; D. Li. *J. Mater. Chem. B* **2013**, *1*, 2128-2131.
- (12) C. Y. Li; C. Y. Wei. *Sensors and Actuators B* **2017**, *240*, 451-458.
- (13) Z. Y. Yan; C. Q. Tian; X. Y. Sun; Y. Wu; D. Li; B. F. Ye. *Anal. Methods* **2018**, *10*, 706-712.
- (14) X. Yuan; Y. Q. Tay; X. Y. Dou; Z. T. Luo; D. T. Leong; J. P. Xie. *Anal. Chem.* **2013**, *85*, 1913-1919.
- (15) T. Liu; Y. Y. Su; H. J. Song; Y. Lv. *Analyst* **2013**, *138*, 6558-6564.
- (16) D. L. Zhou; H. Huang; J. N. Zheng; J. R. Chen; J. J. Feng; A. J. Wang. *Anal. Methods* **2013**, *5*, 6076-6080.
- (17) N. Zhang; F. Qu; H. Q. Luo; N. B. Li. *Biosens. Bioelectron.* **2013**, *42*, 214-218.
- (18) H. M. Liu; G. Mei; S. Chen; Y. F. Long. *Anal. Methods* **2017**, *9*, 3249-3254.
- (19) J. J. Zhu; X. C. Song; L. Gao; Z. M. Li; Z. Liu; S. Ding; S. B. Zou; Y. He. *Biosens. Bioelectron.* **2014**, *53*, 71-75.
- (20) X. J. Yu; Q. J. Wang; X. N. Liu; X. L. Luo. *Microchim. Acta* **2012**, *179*, 323-328.
- (21) L. Y. Feng; L. Wu; F. F. Xing; L. Z. Hu; J. R. Ren; X. G. Qu. *Biosens. Bioelectron.* **2017**, *98*, 378-385.
- (22) X. Q. Liao; H. Y. Wang; Z. J. Li. *Chinese J. Anal. Chem.* **2015**, *43*, 1820-1828.
- (23) J. L. Yang; N. Z. Song; X. J. Lv; Q. Jia. *Sensor. Actuat. B* **2018**, *259*, 226-232.
- (24) L. L. Wu; L. Y. Wang; Z. J. Xie; N. Pan; C. F. Peng. *Sensor. Actuat. B* **2016**, *235*, 110-116.
- (25) S. N. Ding; Y. X. Guo. *Anal. Methods* **2015**, *7*, 5787-5793.
